# Supplementary material for: A bidirectional thermal sensory leaky integrate-and-fire (LIF) neuron model based on bipolar NbOx volatile threshold devices with ultra-low operating current
Source: Royal Society of Chemistry journal article supplement (doi:10.1039/d3nr03034b), 2023-01-01
Supplement: d3nr03034b1.pdf [file d3nr03034b1.pdf]

## Supporting Information

### A bidirectional thermal sensory leaky integrate-and-fire (LIF) neuron model based on bipolar NbO<sub>x</sub> volatile threshold devices with ultra-low operating current

Jianhui Zhao<sup>1#</sup>, Liang Tong<sup>1#</sup>, Jiangzhen Niu<sup>1</sup>, Ziliang Fang<sup>1</sup>, Yifei Pei<sup>2</sup>, Zhenyu Zhou<sup>1</sup>,  
Yong Sun<sup>1</sup>, Zhongrong Wang<sup>1</sup>, Hong Wang<sup>1</sup>, Jianzhong Lou<sup>1</sup>, Xiaobing Yan<sup>1,2\*</sup>

<sup>1</sup> Key Laboratory of Brain-Like Neuromorphic Devices and Systems of Hebei Province, College of  
Electronic & Information Engineering, Institute of Life Science and Green Development, Hebei  
University, Baoding 071002, China

<sup>2</sup> Key Laboratory of Brain-Like Neuromorphic Devices and Systems of Hebei Province, College of  
Physics Science and Technology, Institute of Life Science and Green Development, Hebei University,  
Baoding 071002, China

\* Electronic addresses: [xiaobing\\_yan@126.com](mailto:xiaobing_yan@126.com), [yanxiaobing@ime.ac.cn](mailto:yanxiaobing@ime.ac.cn)

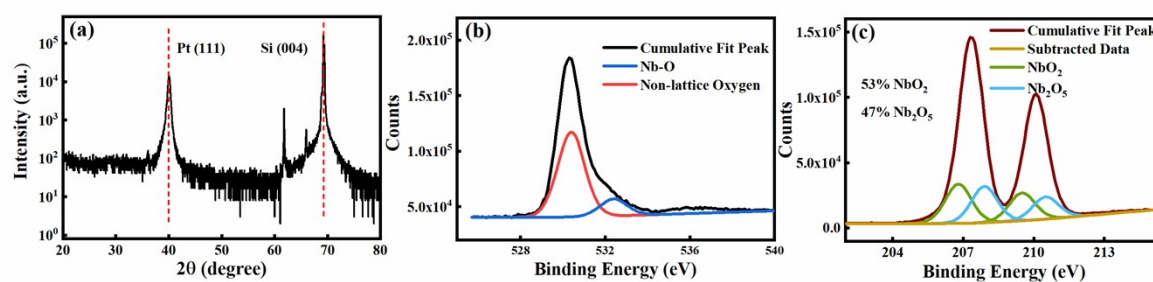

**Fig. S1** (a) The X-ray diffraction (XRD) pattern of the prepared amorphous NbO<sub>x</sub>/Pt/Ti/SiO<sub>2</sub>/Si structure. (b)  
XPS peaks of O 1s. (c) XPS peaks of Nb 3d.

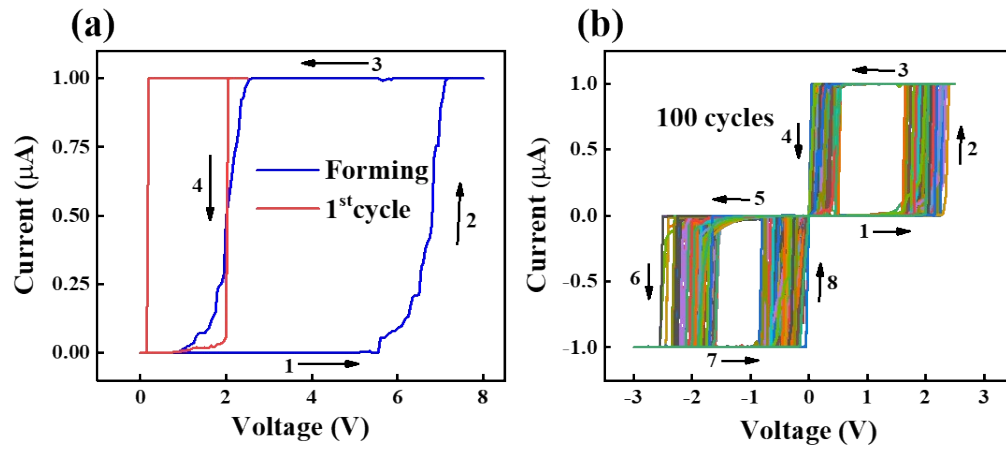

**Fig. S2** (a) Electroforming and threshold I-V characteristics of the TiN/NbO<sub>x</sub>/Pt device. (b) 100 cycles of I-V at 1  $\mu\text{A}$  compliance current.

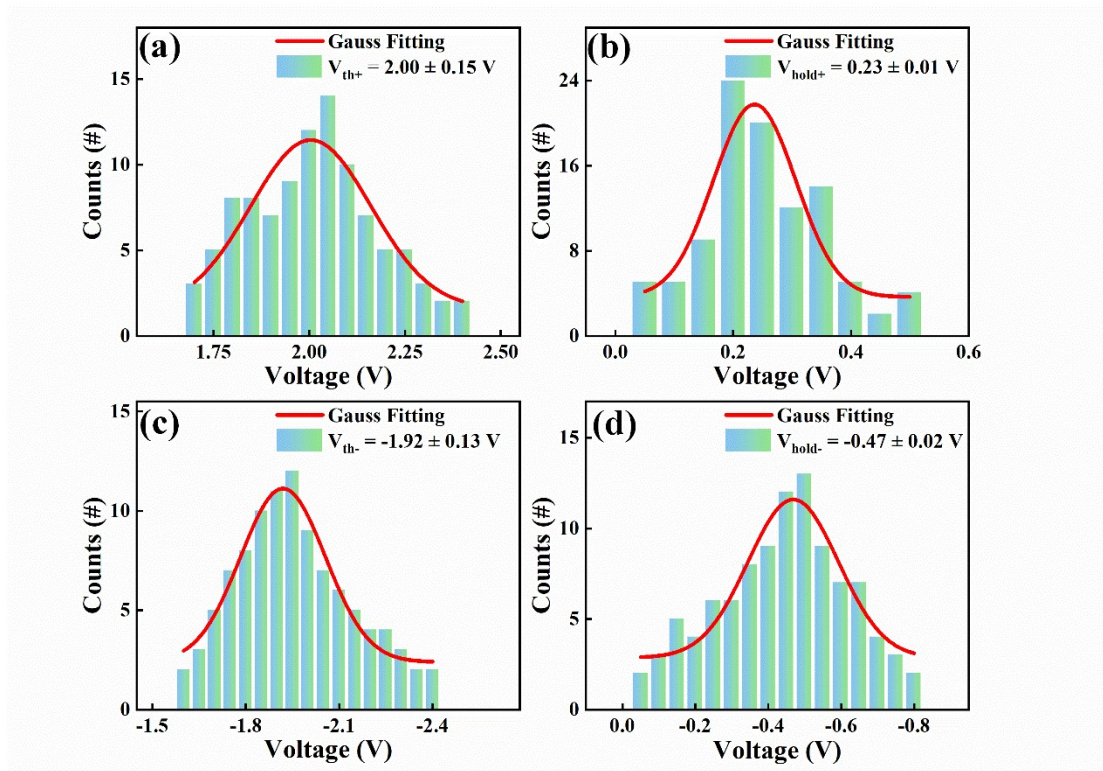

Fig. S3 Statistical chart and Gauss fitting results of (a)  $V_{th+}$ , (b)  $V_{hold+}$ , (c)  $V_{th-}$ , and (d)  $V_{hold-}$ .

**Table S1.** Comparison of off-state current,  $I_{cc}$  and  $I_{ON}/I_{OFF}$  ratio with other Mott devices.

| <b>Material system</b>                             | <b>Off-state current<br/>(A, @1/2 <math>V_{th}</math>)</b> | <b><math>I_{CC}</math>(A)</b> | <b><math>I_{on}/I_{off}</math> ratio<br/>(<math>I_{CC}/I_{1/2V_{th}}</math>)</b> | <b>Reference</b> |
|----------------------------------------------------|------------------------------------------------------------|-------------------------------|----------------------------------------------------------------------------------|------------------|
| Pt/Ti/NbO <sub>x</sub> /Pt                         | $\sim 10^{-5}$                                             | $10^{-4} \sim 10^{-3}$        | 10 ~ 100                                                                         | [1]              |
| TiN/NbO <sub>x</sub> /Si                           | $\sim 10^{-7}$                                             | $10^{-4}$                     | $\sim 1000$                                                                      | [2]              |
| Pd/NbO <sub>x</sub> /Pd                            | $\sim 10^{-5}$                                             | $\sim 8 \times 10^{-4}$       | $\sim 80$                                                                        | [3]              |
| W/NbO <sub>x</sub> /W                              | $\sim 2 \times 10^{-6}$                                    | $10^{-2}$                     | $\sim 5000$                                                                      | [4]              |
| Ti/Au/VO <sub>2</sub> /Ti/Au                       | $\sim 2 \times 10^{-4}$                                    | $\sim 2 \times 10^{-2}$       | $\sim 100$                                                                       | [5]              |
| Au/VO <sub>2</sub> /Al <sub>2</sub> O <sub>3</sub> | $\sim 0.5 \times 10^{-3}$                                  | $3.5 \times 10^{-3}$          | $\sim 7$                                                                         | [6]              |
| Pt/VO <sub>2</sub> /Pt                             | $\sim 8 \times 10^{-5}$                                    | $\sim 4 \times 10^{-3}$       | $\sim 50$                                                                        | [7]              |
| Pt/V <sub>3</sub> O <sub>5</sub> /Pt               | $\sim 7 \times 10^{-3}$                                    | $\sim 7 \times 10^{-2}$       | $\sim 10$                                                                        | [8]              |
| <b>TiN/NbO<sub>x</sub>/Pt</b>                      | <b><math>\sim 10^{-10}</math></b>                          | <b><math>10^{-6}</math></b>   | <b><math>\sim 10^4</math></b>                                                    | <b>This work</b> |

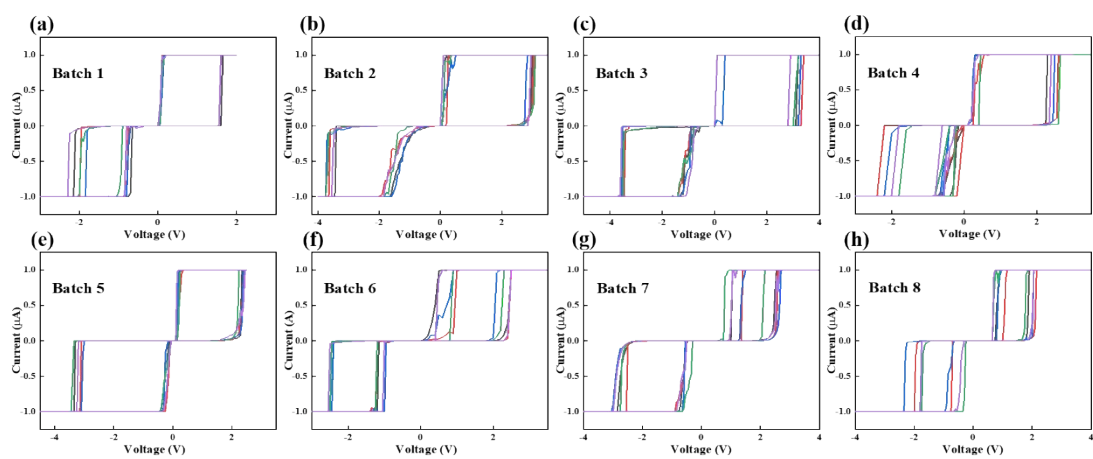

**Fig. S4** (a-h) I-V curves for 8 different batches.

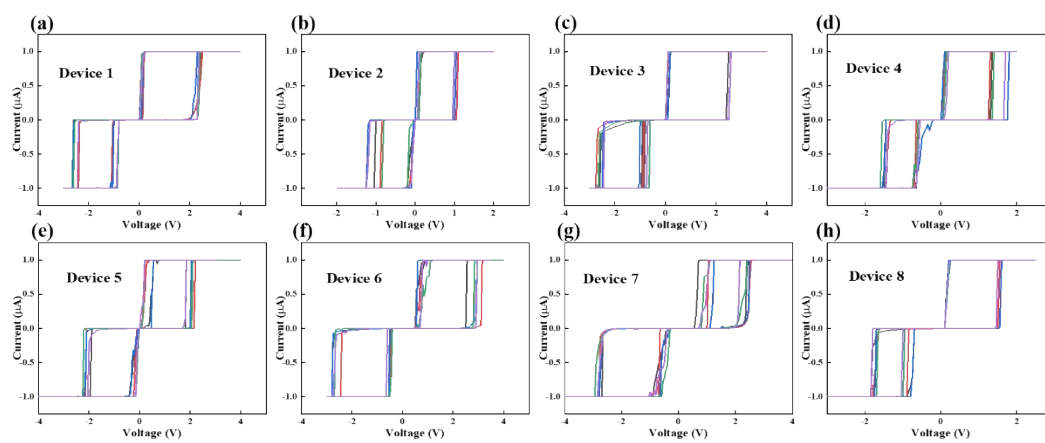

Fig. S5 (a-h) I-V curves for 8 different devices.

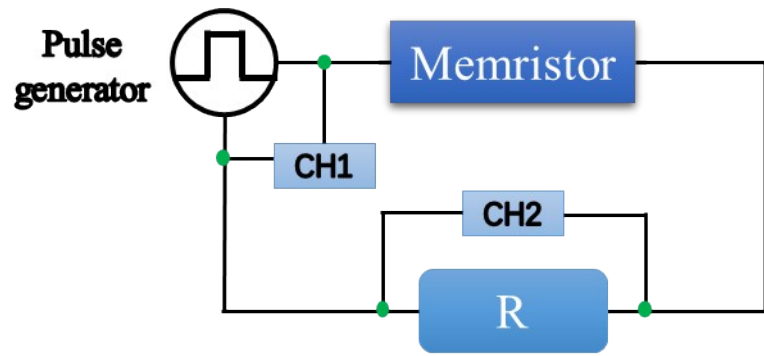

Fig. S6 The test circuit for AC mode.

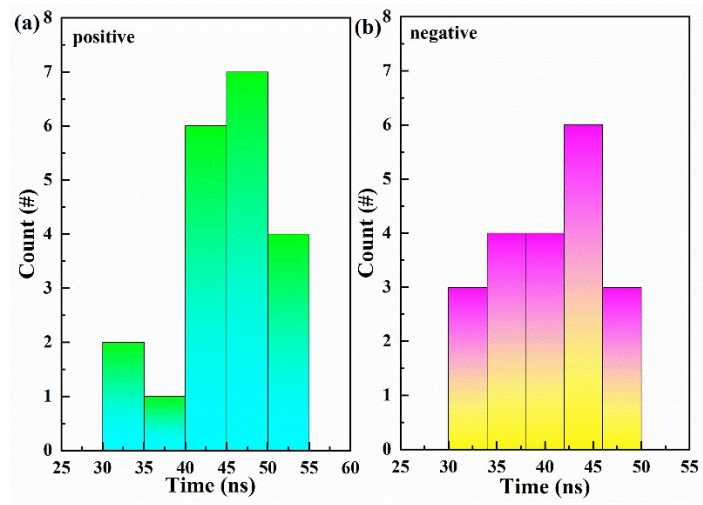

Fig. S7 Statistical distribution of 20 turn-on time at (a) positive voltage, (b) negative voltage.



**Table S2.** Comparison of switching speeds with other threshold memristors (TSM).

| <b>Material system</b>                                      | <b>Turn-on time</b>                          | <b>Bidirectional<br/>or not</b> | <b>Reference</b> |
|-------------------------------------------------------------|----------------------------------------------|---------------------------------|------------------|
| Pt/HfO <sub>2</sub> : Ag NDs/Pt                             | ~ 75 ns                                      | ×                               | [9]              |
| Ag/TaO <sub>x</sub> /TaO <sub>y</sub> /TaO <sub>x</sub> /Ag | ~ 75 ns                                      | ×                               | [10]             |
| Pd/Ag/HfO <sub>x</sub> /Ag/Pd                               | < 75 ns                                      | ×                               | [11]             |
| Pt/Ti/NbO <sub>x</sub> /Pt/Ti                               | ~ 50 ns                                      | ×                               | [12]             |
| Ag/ Li <sub>4</sub> Ti <sub>5</sub> O <sub>12</sub> /Ag     | ~ 150 ns                                     | ×                               | [13]             |
| Pt/Ag/SiO <sub>2</sub> :Ag/Pt                               | ~ 130 ns                                     | ×                               | [14]             |
| Pt/HfO <sub>2</sub> /TiN                                    | ~ 80 μs                                      | ×                               | [15]             |
| Ag/WSe <sub>2</sub> /Ag                                     | ~ 700 ns                                     | ×                               | [16]             |
| <b>TiN/NbO<sub>x</sub>/Pt</b>                               | <b>Positive: ~44 ns<br/>Negative: ~40 ns</b> | <b>⚙</b>                        | <b>This work</b> |

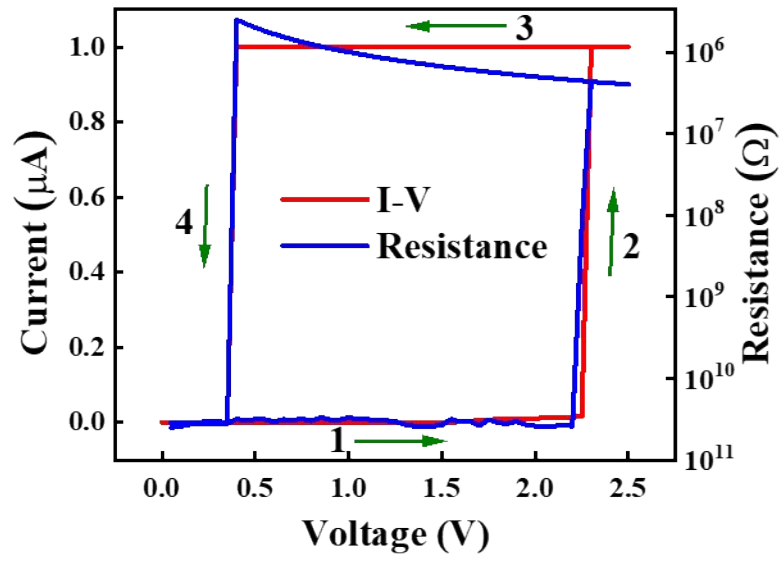

**Fig. S8** The I-V characteristics of the device and the corresponding switching of the resistance.

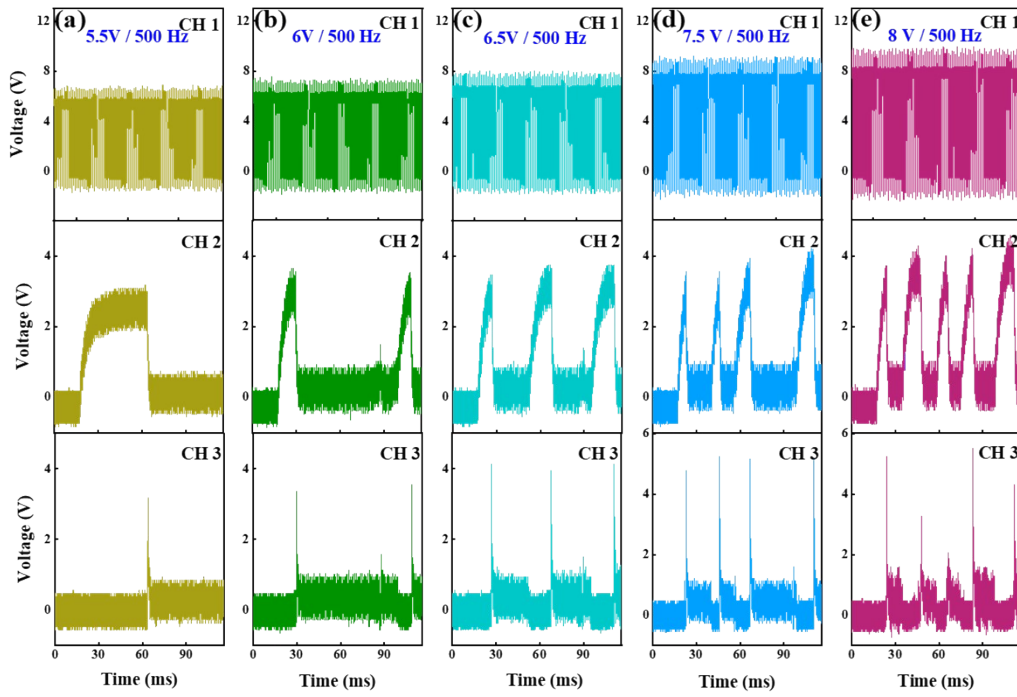

**Fig. S9** When  $R = 5 \text{ M}\Omega$ , the response of CH1, CH2, CH3. (a) 5.5 V, (b) 6 V, (c) 6.5 V, (d) 7.5 V, (e) 8 V.

**Table S3.** Comparison with other neuron models.

| <b>Material System</b>                    | <b>Neuron Model</b> | <b>Bidirectional or not</b> | <b>Reference</b> |
|-------------------------------------------|---------------------|-----------------------------|------------------|
| Ti/Pt/VO <sub>2</sub> /Ti/Pt              | HH                  | ×                           | [17]             |
| Pt/NbO <sub>x</sub> /Pt                   | LIF                 | ×                           | [18]             |
| Pt/Nb <sub>2</sub> O <sub>5</sub> /Pt     | HH                  | ×                           | [19]             |
| InP/ZnS QDs                               | LIF                 | ×                           | [20]             |
| Pt/SiO <sub>x</sub> N <sub>y</sub> :Ag/Pt | LIF                 | ×                           | [21]             |
| Pt/TiO <sub>x</sub> /Ti                   | LIF                 | ×                           | [22]             |
| W/WO <sub>3</sub> /PEDOT:PSS/Pt           | Quasi-HH            | ×                           | [23]             |
| Pt/Ti/NbO <sub>x</sub> /Pt/Ti             | LIF                 | ×                           | [12]             |
| <b>TiN/NbO<sub>x</sub>/Pt</b>             | <b>LIF</b>          | <b>⚙</b>                    | <b>This work</b> |

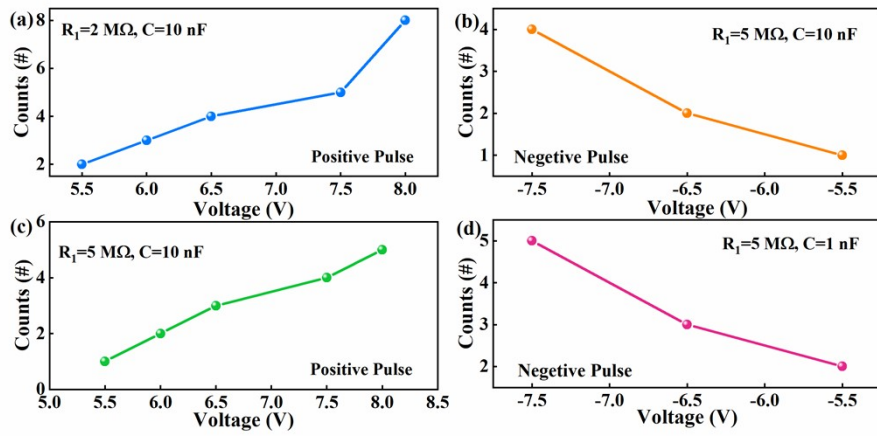

**Fig. S10** The number of output spikes at different voltages. (a)  $R_1 = 2 \text{ M}\Omega$ , (b)  $R_1 = 5 \text{ M}\Omega$ , (c)  $C = 10 \text{ nF}$ , (d)  $C = 1 \text{ nF}$ .

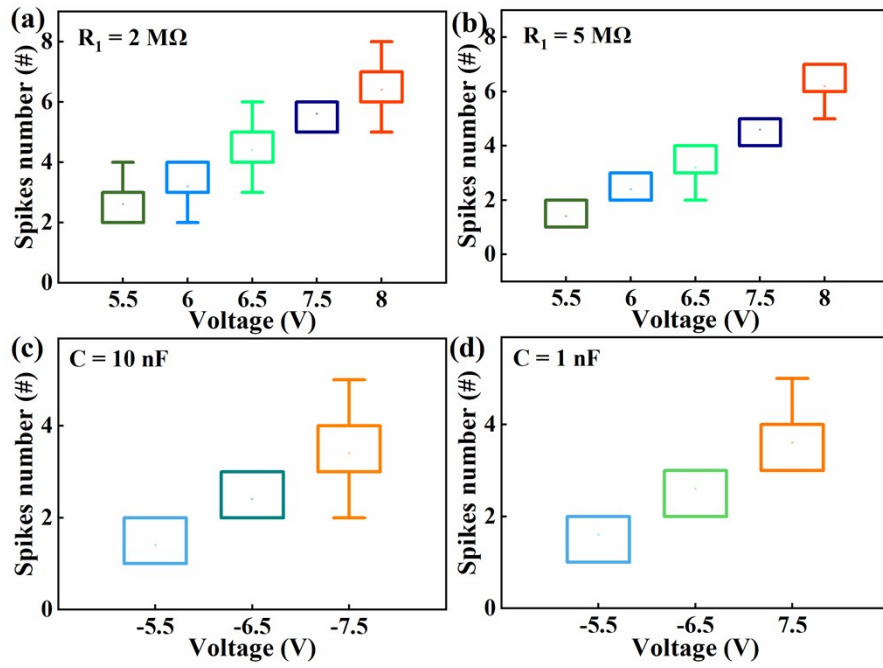

**Fig. S11** Statistical box plots of the number of output spikes at different voltages. (a)  $R_1 = 2 \text{ M}\Omega$ , (b)  $R_1 = 5 \text{ M}\Omega$ , (c)  $C = 10 \text{ nF}$ , (d)  $C = 1 \text{ nF}$ .

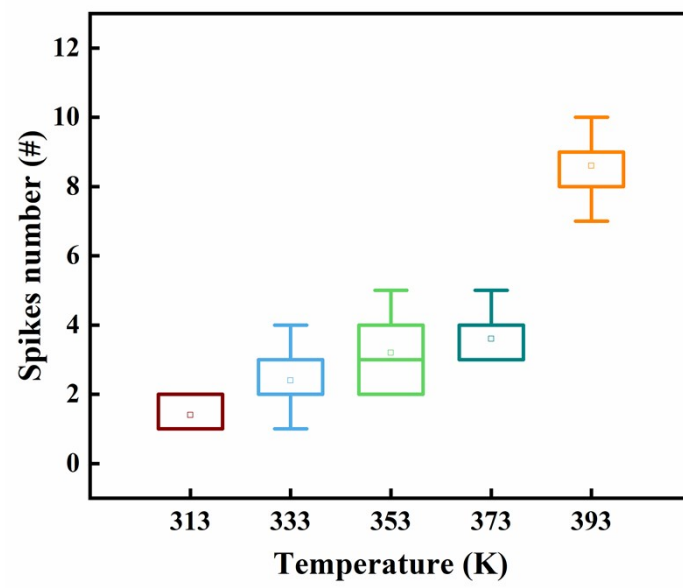

**Fig. S12** Boxplot statistics of the spike response of artificial neurons at different temperatures.

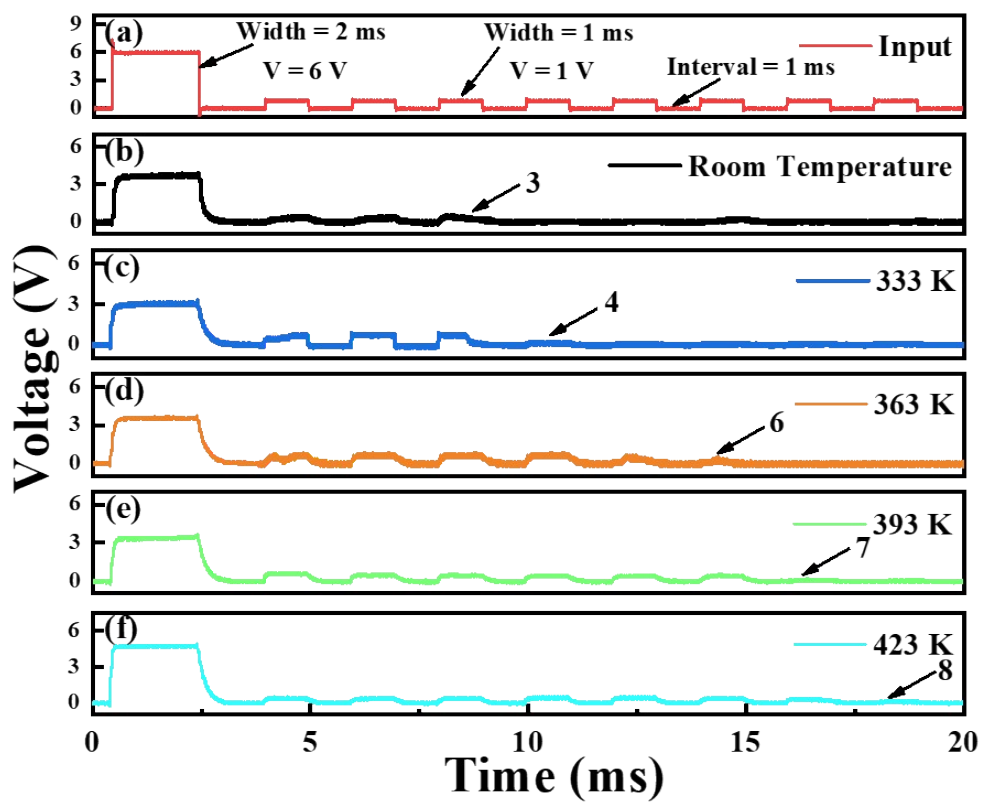

**Fig. S13** Turn-off response of the device at different temperatures. (a) Input. (b-f) Room temperature ( $\sim 293$  K), 333 K, 363 K, 393 K and 423 K.



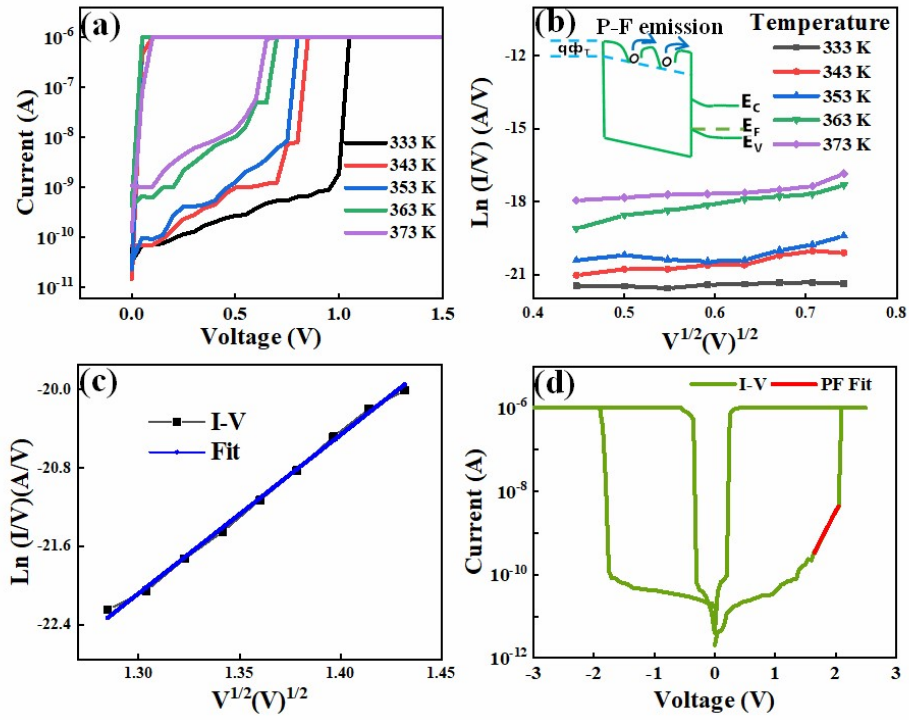

**Fig. S14** (a) Logarithmic form of device I-V curve at ambient temperature of 333 K, 343 K, 353 K, 363 K and 373 K. (b)  $\ln(I/V)$  vs  $V^{1/2}$  plot [Poole-Frenkel (P-F) emission] at different working temperature. (c-d) Fitting curves of P-F emission in the high resistance state of the device.

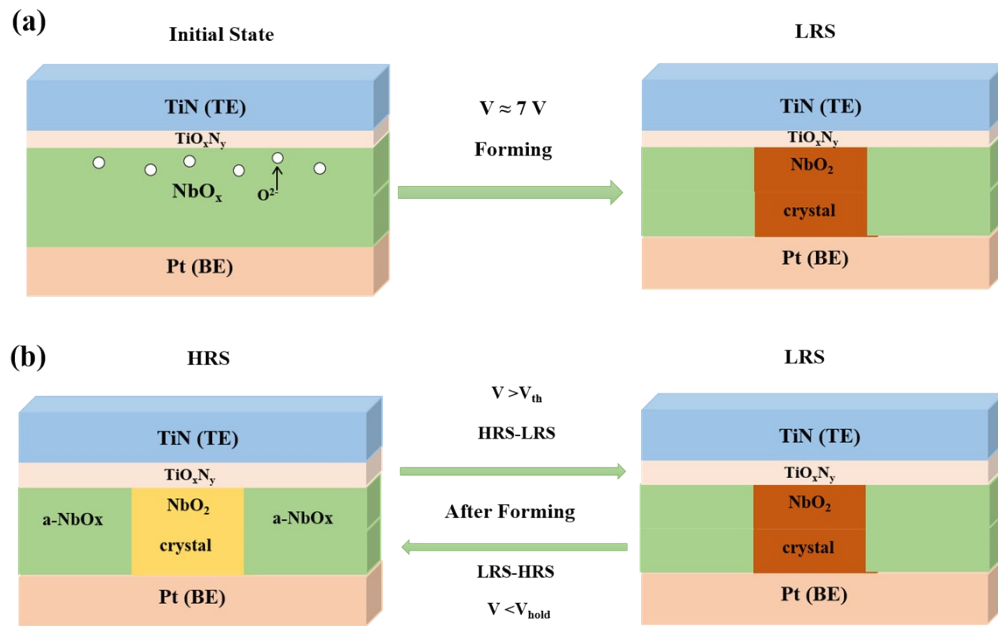

**Fig. S15** The schematic of the switching mechanisms. (a) The forming process of the device. (b) The high and low resistance transition of the device after forming.

## References

- [1] Kim, G. M., *et al.*, *Nat. Commun.* (2021) **12** (1), 8
- [2] Zhang, X., *et al.*, *Nat. Commun.* (2020) **11** (1), 51
- [3] Li, X., *et al.*, *Adv. Mater.* (2022) **35**, 2203684
- [4] Lee, D., *et al.*, *Adv. Electron. Mater.* (2019) **5** (9), 7
- [5] Zhou, X., *et al.*, *Adv. Electron. Mater.* (2021) **7** (5), 2001254
- [6] Yuan, R., *et al.*, *Nat. Commun.* (2022) **13** (1), 3973
- [7] Han, C. Y., *et al.*, *Adv. Mater. Interfaces* (2022) **9** (19), 2200394
- [8] Das, S. K., *et al.*, *Adv. Mater.* (2023) **35** (8), 2208477
- [9] Li, Y., *et al.*, *Adv. Sci.* (2020) **7** (22), 2002251
- [10] Sun, Y., *et al.*, *Adv. Funct. Mater.* (2019) **29** (13), 1808376
- [11] Midya, R., *et al.*, *Adv. Mater.* (2017) **29** (12), 1604457
- [12] Duan, Q., *et al.*, *Nat Commun* (2020) **11** (1), 3399
- [13] Sun, Y., *et al.*, *Adv. Electron. Mater.* (2020) **6** (11), 2000695
- [14] Jiang, H., *et al.*, *Nat. Commun.* (2017) **8**, 9
- [15] Kim, Y., *et al.*, *Adv. Electron. Mater.* (2019) **5** (7), 1800806
- [16] Sivan, M., *et al.*, *Nat. Commun.* (2019) **10**, 12
- [17] Yi, W., *et al.*, *Nat. Commun.* (2018) **9**, 10
- [18] Zhu, J., *et al.*, *Adv. Mater.* (2022) **34** (24), 2200481
- [19] Pickett, M. D., *et al.*, *Nat. Mater.* (2013) **12** (2), 114
- [20] Wang, J., *et al.*, *Adv. Funct. Mater.* (2020) **30** (16), 1909114
- [21] Wang, Z., *et al.*, *Nat. Electron.* (2018) **1** (2), 137
- [22] Park, S.-O., *et al.*, *Nat. Commun.* (2022) **13** (1), 2888
- [23] Huang, H. M., *et al.*, *Adv. Mater.* (2019) **31** (3), 8
